# Supplementary material for: The P2Y12 receptor regulates microglial activation by extracellular nucleotides
Source: Springer Nature journal article supplement (doi:10.1038/nn1805), 2006-11-19
Supplement: 41593_2006_BFnn1805_MOESM1_ESM.pdf [file 41593_2006_BFnn1805_MOESM1_ESM.pdf]

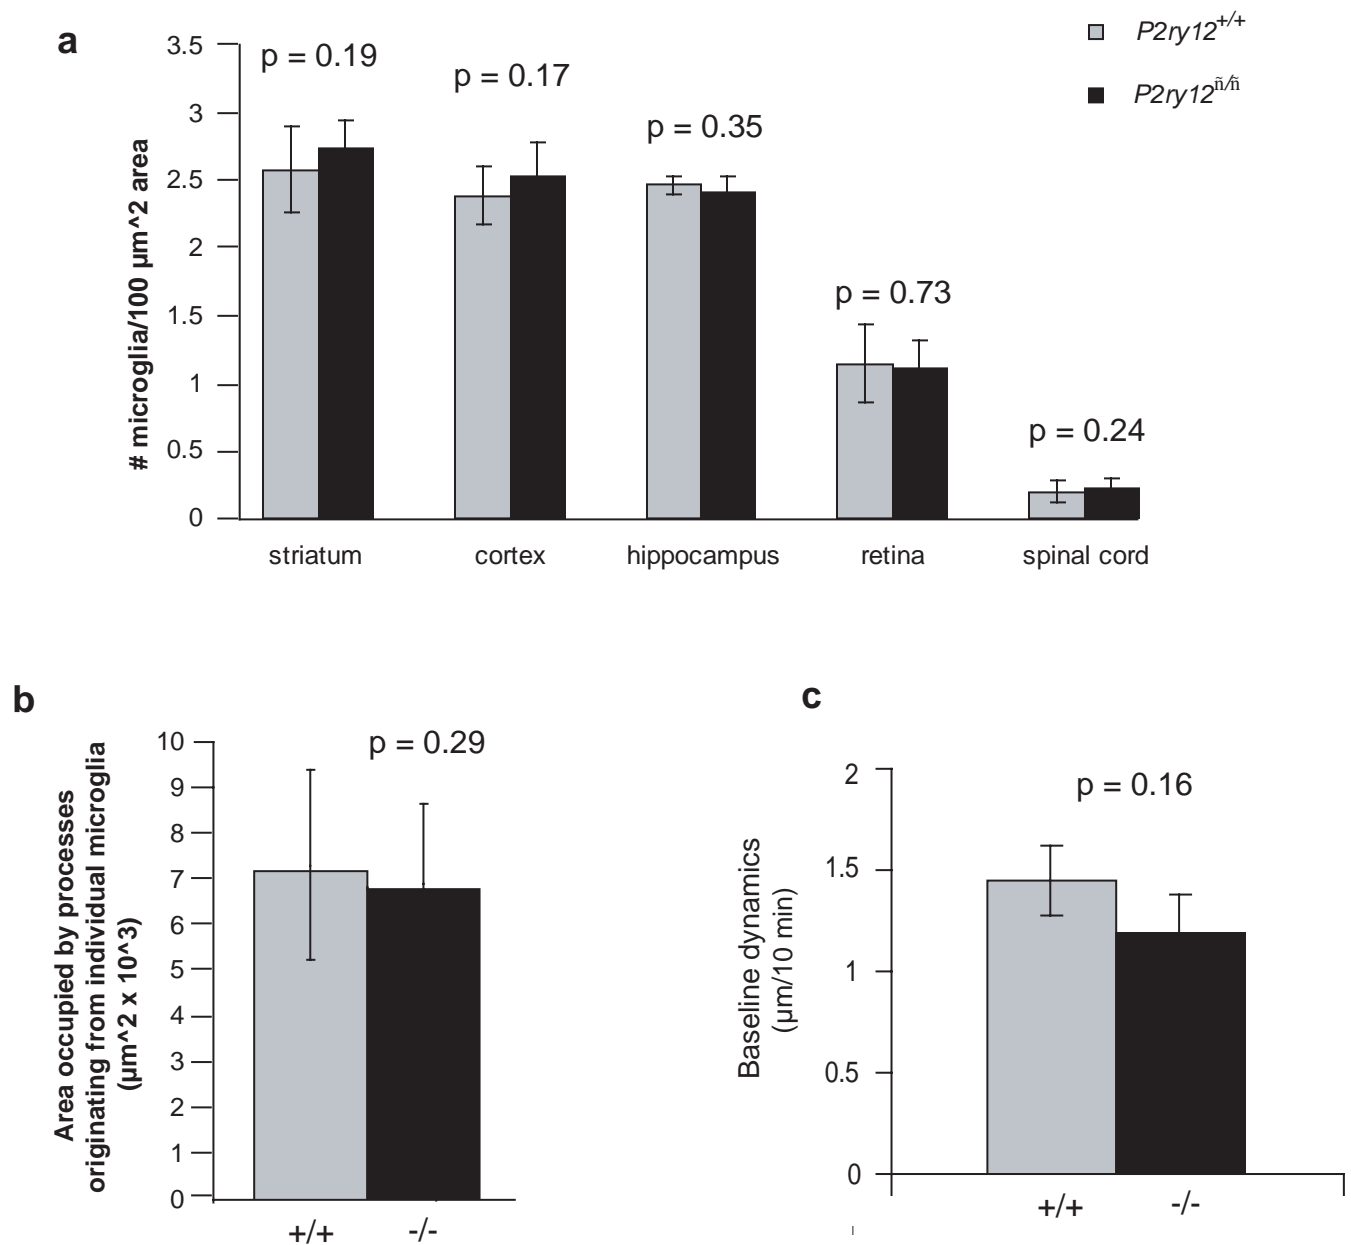

**Supplementary Fig. 1.** Microglia from P2Y12-deficient mice have normal morphology and prevalence within the CNS. **(a)** Microglia were quantified by counting GFP-positive cell bodies in three regions of the brain (striatum, cortex, and hippocampus), retina, and spinal cord in cryostat sections from wild-type (gray) or P2Y12-deficient (black) CX3CR1+/GFP mice ( $n = 2$  mice/genotype; 10-30 sections per animal). The number of microglia per 100  $\mu\text{m}^2$  area is shown (mean  $\pm$  s.e.m.). **(b)** The area occupied by processes originating from individual microglia was quantified from whole mount retinas ( $n = 1$  mouse/genotype; 12 sections per animal; mean  $\pm$  s.e.m.). **(c)** Microglia from P2Y12-deficient animals display normal baseline motility in the living brain. The average processes length change ( $\mu\text{m}$ ) over a 10 min time scale is displayed on the y-axis ( $n = 3$  animals per genotype, 8-16 processes per animal.)
