# Supplementary material for: The P2Y12 receptor regulates microglial activation by extracellular nucleotides
Source: Springer Nature journal article supplement (doi:10.1038/nn1805), 2006-11-19
Supplement: 41593_2006_BFnn1805_MOESM2_ESM.pdf [file 41593_2006_BFnn1805_MOESM2_ESM.pdf]

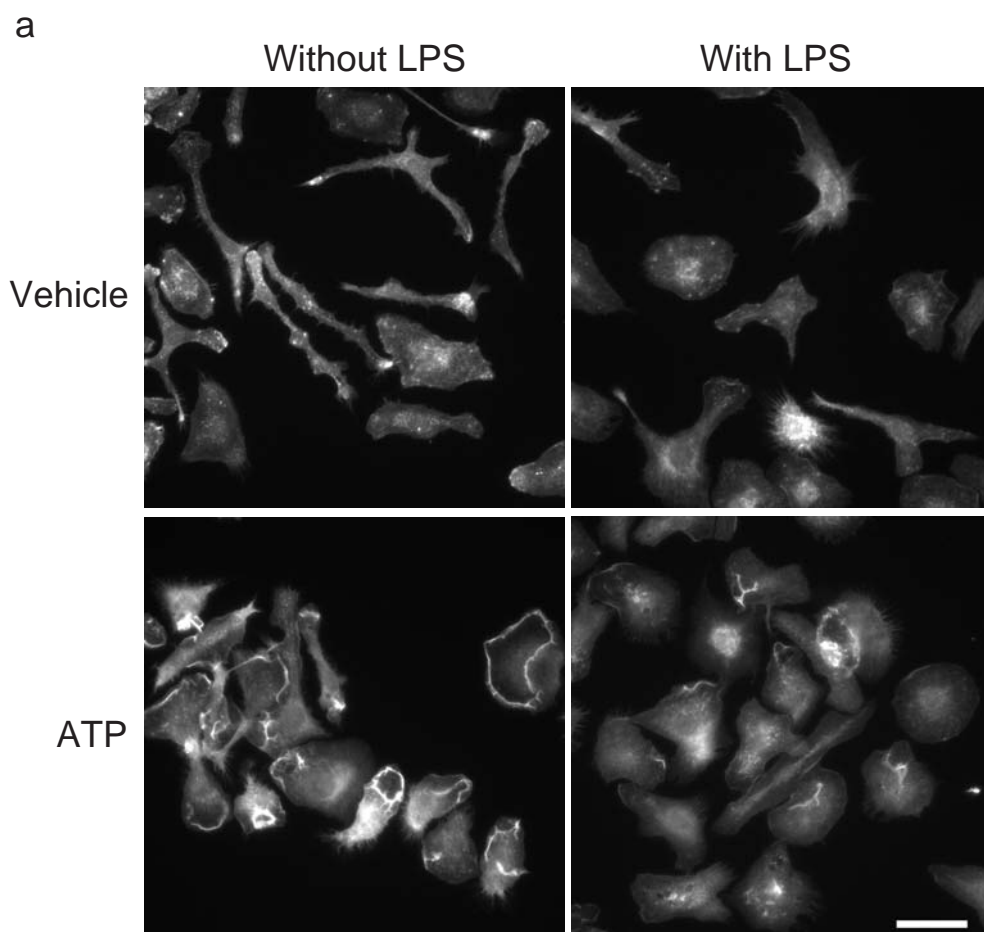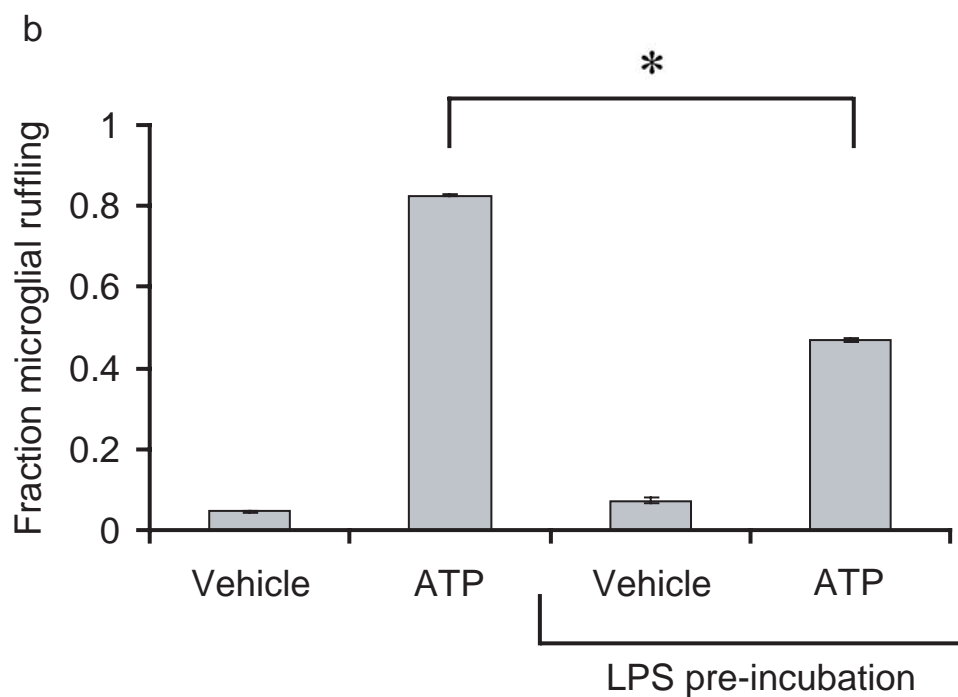

**Supplementary Fig. 2.** Pre-treatment with LPS diminishes ATP-induced microglial ruffling. Microglia were cultured from brains of wild-type mice and exposed to vehicle (media) or LPS (0.1 mg/ml) for 6 h in serum-free media followed by a 4 h starvation period. Cells were subsequently exposed to ATP (50  $\mu$ M) for 5 min and membrane ruffling assessed by staining with FITC-conjugated phalloidin (see Methods). Representative images (a) and quantification (b) illustrates significant decrease in nucleotide responsiveness following LPS exposure. Scale bar = 20  $\mu$ m. ( $n = 4$  trials per experimental condition, 200-400 cells per trial,  $*P < 0.01$ )
