# Supplementary material for: The P2Y12 receptor regulates microglial activation by extracellular nucleotides
Source: Springer Nature journal article supplement (doi:10.1038/nn1805), 2006-11-19
Supplement: 41593_2006_BFnn1805_MOESM3_ESM.pdf [file 41593_2006_BFnn1805_MOESM3_ESM.pdf]

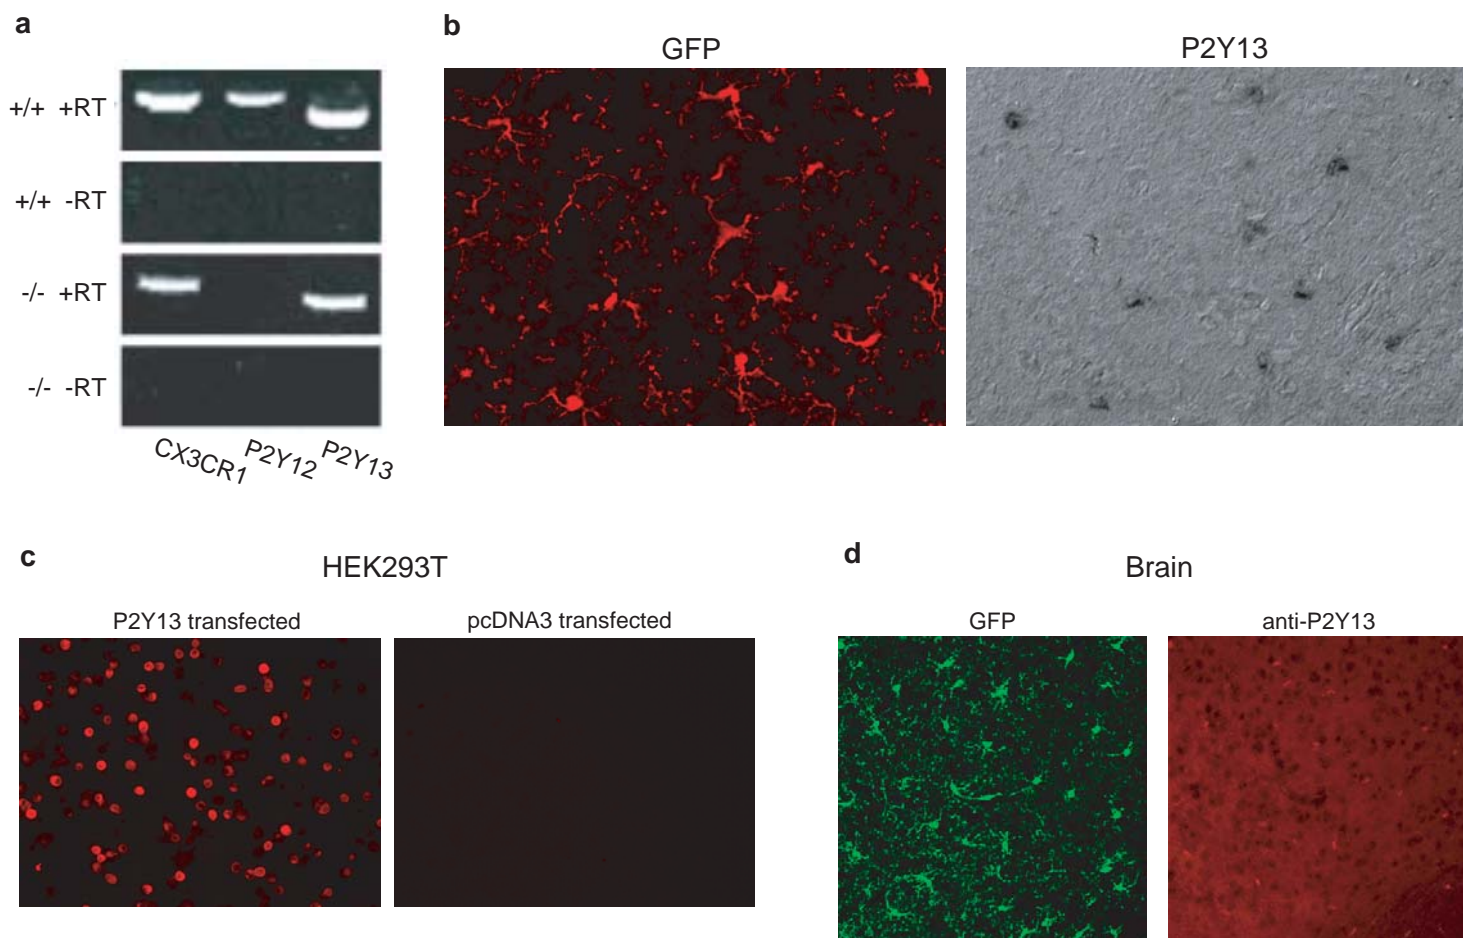

**Supplementary Fig. 3.** Microglia express P2Y13 transcripts, but not detectable receptor protein. **(a)** RT-PCR products were produced with primer pairs designed to specifically amplify P2Y12 or P2Y13 coding regions (or CX3CR1 as a positive control) using total RNA from microglia cultured from wild-type (+/+) or P2Y12-deficient mice. Amplification of RNA-derived reverse transcripts was confirmed by lack of signal in the absence of reverse transcriptase (RT). We also performed quantitative RT-PCR to ascertain whether P2Y13 mRNA expression is markedly altered in P2Y12-deficient mice, reflecting either a compensatory increase or a decrease due to the close proximity (~5 kilobases) of the P2Y13 gene to the targeted locus. We found a slight reduction (~2-fold) in P2Y13 signal amplified from brain tissue of P2Y12-deficient mice compared to wild-type littermates. **(b)** In situ hybridization of brain sections from P2ry12+/+Cx3cr1+/GFP mice using a P2Y13-specific anti-sense probe revealed weak, but detectable signals in GFP-positive microglia. **(c)** Transiently transfected HEK923T cells expressing mouse P2Y13 cDNA show immunoreactivity with anti-P2Y13 antibody, whereas vector (pcDNA3)-transfected controls do not. **(d)** Brain sections from P2ry12+/+Cx3cr1+/GFP mice lacked detectable immunoreactivity when stained with anti-P2Y13 antibody. GFP fluorescence shows location of microglia. Scale bars = 50  $\mu$ m.

All procedures were performed as described in the Methods. The following primers pairs were used for PCR analysis:

P2Y12: 5'-CCTCAGCCAATACCACCTTCTCCCC-3' and 5' CGCTTGGTTCGCCACCTTCTTGTCCCTT-3'

P2Y13: 5'-GGGACACTCGGATGACACAGCTGC-3' and 5'-GCCAGAAAGAGAGTTGCTTCTTTAGCAATAAACAGC-3'

CX3CR1: 5'-TTCACGTTTCGGTCTGGTGGG-3' and 5'-GGTTCCTAGTGGAGCTAGGG-3'

Anti-P2Y13 receptor polyclonal antibody was generated by immunizing rabbit with a synthetic peptide corresponding to the mouse P2Y13 C-terminus (NH<sub>2</sub>-Cys-Thr-Ala-Gly-Ser-Ser-Glu-Asp-His-His-Ser-Ser-Gln-Thr-Asp-Asn-Ile-Thr-Leu-Ala-OH; Anaspec, Inc). Antibody was affinity purified using a Sulfolink coupling gel (Pierce) to immobilize the antigenic peptide.
